# Supplementary material
Source: HighWire-hosted journal article supplement (https://www.annals.org/content/suppl/2006/11/30/145.11.845)
Supplement: Ranney_DB_145-11-845-DC1-1.pdf [file Ranney_DB_145-11-845-DC1-1.pdf]

**Table. Summary of Review Article Outcomes\***

| Study, Year (Reference)                               | Treatment Format                                                                                                                                                                                                                                                                                                                                                                      | Review Article Outcomes                                                                                                                                                                                                                                                                | Studies, n                                                                                                                                                                                                                                                                                                                                    | Type of Review                             | Quality of Review |
|-------------------------------------------------------|---------------------------------------------------------------------------------------------------------------------------------------------------------------------------------------------------------------------------------------------------------------------------------------------------------------------------------------------------------------------------------------|----------------------------------------------------------------------------------------------------------------------------------------------------------------------------------------------------------------------------------------------------------------------------------------|-----------------------------------------------------------------------------------------------------------------------------------------------------------------------------------------------------------------------------------------------------------------------------------------------------------------------------------------------|--------------------------------------------|-------------------|
| Fiore et al., 2000 (1)                                | Self-help                                                                                                                                                                                                                                                                                                                                                                             | Self-help was of marginal efficacy. Little evidence supported the view that providing multiple types of self-help, when offered without any person-to-person intervention, significantly enhanced treatment outcomes.                                                                  | 21 RCTs                                                                                                                                                                                                                                                                                                                                       | Meta-analysis                              | Good              |
|                                                       | Counseling and other behavioral therapies                                                                                                                                                                                                                                                                                                                                             | Some support for 3 types of counseling and behavioral therapies: 1) practical counseling (problem-solving skills), 2) social support as part of treatment, and 3) social support outside of treatment.                                                                                 | 62 RCTs                                                                                                                                                                                                                                                                                                                                       | Meta-analysis                              | Good              |
|                                                       | Intensity of clinician intervention                                                                                                                                                                                                                                                                                                                                                   | Minimal interventions lasting < 3 min increase overall tobacco abstinence rates.                                                                                                                                                                                                       | 43 RCTs (length of sessions)                                                                                                                                                                                                                                                                                                                  | Meta-analysis                              | Good              |
|                                                       |                                                                                                                                                                                                                                                                                                                                                                                       | Intensive interventions were more effective than less intensive interventions.                                                                                                                                                                                                         | 35 RCTs (number of contacts)<br>45 RCTs (number of sessions)                                                                                                                                                                                                                                                                                  |                                            |                   |
|                                                       | Pharmacotherapies                                                                                                                                                                                                                                                                                                                                                                     | First-line pharmacotherapies, such as bupropion SR or NRTs (e.g., nicotine gum, nicotine inhaler, nicotine patch, and nicotine nasal spray), consistently increase abstinence rates. Second-line pharmacotherapies, including clonidine and nortriptyline, also demonstrated efficacy. | 2 RCTs (bupropion SR)<br>13 RCTs (nicotine gum)<br>4 RCTs (nicotine inhaler)<br>3 RCTs (nicotine nasal spray)<br>27 RCTs (nicotine patch)<br>5 RCTs (clonidine)<br>2 RCTs (nortriptyline)                                                                                                                                                     | Meta-analysis                              | Good              |
| Combined pharmacotherapies                            | Combination of the nicotine patch with self-administered NRT (gum or nasal spray) was more effective than single form of nicotine replacement. Evidence for effectiveness of other pharmaceutical treatments (e.g., antidepressants other than bupropion SR and nortriptyline, anxiolytics, benzodiazepines, $\beta$ -blockers, silver acetate, and mecamylamine) was not consistent. | 3 RCTs (2 studies used nicotine patch with nicotine gum, and 1 study used nicotine patch with nicotine nasal spray)                                                                                                                                                                    | Meta-analysis                                                                                                                                                                                                                                                                                                                                 | Good                                       |                   |
| Task Force on Community Preventive Services, 2005 (8) | Reduce out-of-pocket costs                                                                                                                                                                                                                                                                                                                                                            | Reducing out-of-pocket cost for smoking cessation is effective in increasing use of these therapies and number of tobacco users who quit.                                                                                                                                              | 5 studies (study designs not reported)                                                                                                                                                                                                                                                                                                        | Systematic review without meta-analysis    | Good              |
| U.S. Surgeon General, 2000 (9)                        | Self-help                                                                                                                                                                                                                                                                                                                                                                             | Evidence was mixed about the efficacy of self-help manuals as an aid to smoking cessation.                                                                                                                                                                                             | 31 studies (study designs not reported)                                                                                                                                                                                                                                                                                                       | Systematic review with narrative synthesis | Good              |
|                                                       | Counseling                                                                                                                                                                                                                                                                                                                                                                            | Counseling and advice increases smoking cessation rates (which may be further improved) by increasing the frequency and duration of contact.                                                                                                                                           | 15 RCTs, 2 meta-analyses                                                                                                                                                                                                                                                                                                                      | Systematic review with narrative synthesis | Good              |
|                                                       | Pharmacotherapies                                                                                                                                                                                                                                                                                                                                                                     | Consistent evidence shows that pharmacologic treatments for smoking cessation (nicotine replacement therapies and bupropion in particular) can help people quit smoking.                                                                                                               | 6 meta-analyses (transdermal nicotine)<br>5 RCTs, 2 meta-analyses (nicotine nasal spray)<br>3 RCTs, 2 meta-analyses (nicotine inhaler)<br>2 RCTs, 1 meta-analysis (bupropion),<br>2 meta-analysis (clonidine),<br>2 RCTs, 1 meta-analysis (nortriptyline), 2 RCTs, and<br>2 trials type not specified (other antidepressants and anxiolytics) | Systematic review with narrative synthesis | Good              |

*Continued on following page*

Table—Continued

| Study, Year (Reference)        | Treatment Format                                                                                                  | Review Article Outcomes                                                                                                                                                                                                                                                                                                  | Studies, n                              | Type of Review                             | Quality of Review |
|--------------------------------|-------------------------------------------------------------------------------------------------------------------|--------------------------------------------------------------------------------------------------------------------------------------------------------------------------------------------------------------------------------------------------------------------------------------------------------------------------|-----------------------------------------|--------------------------------------------|-------------------|
| el-Guebaly et al., 2002 (10)   | Pharmacotherapies                                                                                                 | Posttreatment and 12-month quit rates for psychiatric patients appear to be only marginally lower than those for nonpsychiatric patients<br>A majority of reviewed interventions used a combination of medication and educational and cognitive behavioral approaches and are not sufficiently uniform for meta-analysis | 24 studies (study designs not reported) | Systematic review with narrative synthesis | Fair              |
|                                | Cognitive-behavioral therapies plus standard treatment                                                            | Integration of cognitive behavioral therapy with standard smoking cessation strategies appears to result in higher quit rates for persons with a history of major depression                                                                                                                                             | 7 studies (study designs not reported)  | Systematic review with narrative synthesis | Good              |
| Lancaster and Stead, 2005 (11) | Individual counseling                                                                                             | Individual counseling for smoking cessation was more effective than control intervention<br>Meta-analysis did not detect a greater effect of intensive counseling than brief counseling                                                                                                                                  | 21 studies (RCTs and non-RCTs)          | Systematic review with narrative synthesis | Good              |
| Lancaster and Stead, 2005 (12) | Self-help                                                                                                         | Self-help materials to support quit attempts are of limited benefit unless the materials consider each smoker's individual characteristics                                                                                                                                                                               | 17 RCTs                                 | Systematic review with narrative synthesis | Good              |
|                                | Self-help materials as adjunct to other treatments                                                                | Review found no evidence of benefit from adding self-help materials to face-to-face advice or NRT                                                                                                                                                                                                                        | 16 RCTs                                 | Systematic review with narrative synthesis | Good              |
| Prochaska et al., 2004 (2)     | Counseling, cognitive behavioral therapy, pharmacotherapies                                                       | Intervention effects for smoking cessation were significant at posttreatment and were similar to those in participants in addiction treatment and recovery                                                                                                                                                               | 18 RCTs                                 | Meta-analysis                              | Good              |
|                                | Concurrent treatment                                                                                              | Smoking interventions provided during treatment were associated with 25% increased likelihood for long-term abstinence from alcohol and illicit drugs                                                                                                                                                                    | 11 RCTs                                 | Meta-analysis                              | Good              |
|                                | Pharmacotherapies                                                                                                 | Subgroup analyses revealed stronger effects among studies that provided NRT and were more recently published (NRT was provided in conjunction with psychosocial interventions)                                                                                                                                           | 11 RCTs                                 | Meta-analysis                              | Good              |
| Lumley et al., 2004 (13)       | Health care professional advice, individual and group counseling, peer support, NRT, feedback, provider education | Pregnant women in intervention groups were more likely than those in control groups to quit smoking<br>Interventions reduced low-birth-weight babies and preterm births                                                                                                                                                  | 48 studies (RCTs and quasi-randomized)  | Systematic review with narrative synthesis | Good              |
|                                | Rewards plus social support                                                                                       | Rewards plus social support resulted in significantly greater smoking reduction than other interventions                                                                                                                                                                                                                 | 2 studies (study design not reported)   |                                            |                   |

Table—Continued

| Study, Year (Reference)       | Treatment Format                                                                    | Review Article Outcomes                                                                                                                                                                                                                                                                                                                                                                                                                                                                                             | Studies, n                                          | Type of Review                             | Quality of Review |
|-------------------------------|-------------------------------------------------------------------------------------|---------------------------------------------------------------------------------------------------------------------------------------------------------------------------------------------------------------------------------------------------------------------------------------------------------------------------------------------------------------------------------------------------------------------------------------------------------------------------------------------------------------------|-----------------------------------------------------|--------------------------------------------|-------------------|
| Rigotti et al., 2003 (14)†    | In-patient contact                                                                  | Review found no evidence to assess ≤15-min in-patient interventions >15 min in-patient interventions were not significantly associated with higher quit rates                                                                                                                                                                                                                                                                                                                                                       | No studies<br>3 studies (RCTs and quasi-randomized) | Systematic review with narrative synthesis | Good              |
|                               | In-patient contact plus short follow-up                                             | In-patient interventions plus follow-up for ≤1 mo did not show a significant benefit                                                                                                                                                                                                                                                                                                                                                                                                                                | 6 studies (RCTs and quasi-randomized)               |                                            |                   |
|                               | In-patient contact plus long follow-up                                              | In-patient interventions plus follow-up for ≥1 mo was associated with a significantly higher cessation rate compared with controls                                                                                                                                                                                                                                                                                                                                                                                  | 9 studies (RCTs and quasi-randomized)               |                                            |                   |
| Melvin and Gaffney, 2004 (15) | Brief counseling, adjuncts to brief counseling, pharmacotherapy, provider education | Smoking status and secondhand smoke exposure should be assessed for all pregnant and postpartum women and parents<br>Review found brief counseling with "5 A's" approach‡ is still the best treatment for light and moderate smokers<br>Pharmacotherapy should be offered to parents who smoke<br>Additional research is recommended on ways to improve disclosure, safety, efficacy of pharmacotherapy, use of biomarker feedback or incentives, partner involvement, and interventions to reduce secondhand smoke | Number of studies included not specified            | Systematic review with narrative synthesis | Good              |

\* NRT = nicotine replacement therapy; RCT = randomized, controlled trial; SR = sustained release.

† Miller NH, Smith PM, DeBusk RF, Sobel DS, Taylor CB. Smoking cessation in hospitalized patients. Results of a randomized trial. *Archives of Internal Medicine*. 1997; 157:409-15. (This study is included in both the short- and long-term follow-up treatment categories.)

‡ Ask, Advise, Assess, Assist, Arrange.
