# Supplementary material
Source: HighWire-hosted journal article supplement (https://www.annals.org/content/suppl/2006/11/30/145.11.845)
Supplement: Ranney_DB_145-11-845-DCA1-A1.pdf [file Ranney_DB_145-11-845-DCA1-A1.pdf]

## *Appendix Table 1. Medical Subject Headings and Text Words*

### **Medical Subject Headings**

Tobacco use cessation  
Smoking  
Smoking cessation  
Smoking/prevention and control  
Primary prevention  
Community health aides  
Community health centers  
Community health nursing  
Community health planning  
Community health services  
Community medicine  
Community mental health centers  
Community mental health services  
Community networks  
Health services needs and demand  
Health plan implementation  
Consumer participation  
Consumer satisfaction  
Randomized controlled trials  
Double-blind method  
Single-blind method  
Random allocation

### **Text word search terms**

Tobacco  
Smoking  
Cessation  
Quit

Comorbidity  
Depression  
Depressive disorder  
Bipolar disorder  
Attention deficit disorder with  
hyperactivity  
Stress disorders, post-traumatic  
Diabetes mellitus  
Hypertension  
Heart diseases  
Asthma  
Obesity  
Risk factors  
Risk-taking  
Choice behavior  
Advertising  
Marketing  
Social marketing  
Patient education  
Diffusion of innovation

Community  
Intervention  
Plan  
Program  
Trial
