# Supplementary material
Source: HighWire-hosted journal article supplement (https://www.annals.org/content/suppl/2006/11/30/145.11.845)
Supplement: Ranney_DB_145-11-845-DCA1-A2.pdf [file Ranney_DB_145-11-845-DCA1-A2.pdf]

*Appendix Table 2. Smoking Cessation Strategies: Inclusion and Exclusion Criteria for New Studies\**

| Category                                              | Criteria                                                                                                                                                                                                                                                                                                                                                                                                                                                                                                                                                                                                                                                                                                                                                                                                                          |
|-------------------------------------------------------|-----------------------------------------------------------------------------------------------------------------------------------------------------------------------------------------------------------------------------------------------------------------------------------------------------------------------------------------------------------------------------------------------------------------------------------------------------------------------------------------------------------------------------------------------------------------------------------------------------------------------------------------------------------------------------------------------------------------------------------------------------------------------------------------------------------------------------------|
| Study sample                                          | <p>Humans, all races, ethnicities, and cultural groups</p> <p>KQ 1: Adolescents (age 13–18 y), young adults (age 18–24 y), and diverse populations</p> <p>KQ 2: Adolescents, young adults, adults (age <math>\geq 18</math> y), and diverse populations</p> <p>KQ 3: Adults and diverse populations</p> <p>KQ 4: Adolescents, young adults, and adults</p> <p>KQ 5: Adolescents, young adults, and adults with comorbid conditions and risk behaviors</p>                                                                                                                                                                                                                                                                                                                                                                         |
| Study outcomes                                        | <p>KQ 1: Reduced initiation of tobacco use</p> <p>KQ 2: Increased quit rates; greater numbers of smoking cessation participants (i.e., increased participation)</p> <p>KQ 3: Increased quit rates; change in provider behaviors concerning smoking cessation</p> <p>KQ 4: Increased use; increased substitution of smokeless tobacco for smoking; harm reduction</p> <p>KQ 5: Reduced initiation of tobacco use; increased quit rates</p>                                                                                                                                                                                                                                                                                                                                                                                         |
| Study geography                                       | Developed countries: United States, Canada, United Kingdom, Western Europe, Australia, and New Zealand                                                                                                                                                                                                                                                                                                                                                                                                                                                                                                                                                                                                                                                                                                                            |
| Time period                                           | <p>KQ 1: Studies that addressed prevention of adolescent and youth tobacco use: 1 January 2000 to 10 June 2005</p> <p>Studies that addressed product restrictions in the tobacco industry aimed at countering youth tobacco use: 1 January 1980 to 10 June 2005</p> <p>KQ 2 and KQ 3: 1 January 1999 to 10 June 2005</p> <p>KQ 4 and KQ 5: 1 January 1980 to 10 June 2005</p>                                                                                                                                                                                                                                                                                                                                                                                                                                                     |
| Publication languages                                 | English only                                                                                                                                                                                                                                                                                                                                                                                                                                                                                                                                                                                                                                                                                                                                                                                                                      |
| Admissible evidence (study design and other criteria) | <p>Original research studies that provide sufficient detail on methods and results to enable use and adjustment of the data and results; relevant outcomes must be able to be abstracted from data presented in the papers</p> <p>Eligible study designs include</p> <ul style="list-style-type: none"> <li>RCTs</li> <li>Nonrandomized controlled trials</li> <li>Observational studies: prospective and retrospective cohort studies, case-control studies, and cross-sectional studies</li> </ul> <p>Single case reports or small case series are excluded</p> <p>Sample sizes must be appropriate for the study question addressed in the paper</p> <ul style="list-style-type: none"> <li>RCTs: <math>\geq 30</math> participants</li> <li>Observational studies and non-RCTs: <math>\geq 100</math> participants</li> </ul> |

\* KQ = key question; RCT = randomized, controlled trial.
