# Supplementary material
Source: HighWire-hosted journal article supplement (https://www.annals.org/content/suppl/2006/11/30/145.11.845)
Supplement: Ranney_DB_145-11-845-DCA1-A3.pdf [file Ranney_DB_145-11-845-DCA1-A3.pdf]

### *Appendix Table 3. Key Questions for the Full Evidence Report Prepared for the Agency for Healthcare Research and Quality\**

- KQ 1. What are the effective population- and community-based interventions to prevent tobacco use in diverse populations of adolescents and young adults?
- KQ 2. What are effective strategies for increasing consumer demand among diverse populations for and use of proven individually oriented cessation treatments?
- KQ 3. What are effective strategies for increasing implementation of proven population-level tobacco use cessation strategies, particularly by health care systems and communities?
- KQ 4. What effect does smokeless tobacco product marketing and use have on population harm from tobacco use?
- KQ 5. What is the effectiveness of prevention and of cessation interventions in populations with co-occurring morbidities and risk behaviors?

---

\* KQ = key question.
