# Supplementary material
Source: HighWire-hosted journal article supplement (https://www.annals.org/content/suppl/2006/11/30/145.11.845)
Supplement: Ranney_DB_145-11-845-DCA1-A4.pdf [file Ranney_DB_145-11-845-DCA1-A4.pdf]

**Appendix Table 4. Smoking Cessation Intervention Strategies To Improve Success Rates for Quit Attempts\***

| Study, Year, Setting (Reference)                                                             | Design, Exposure, and Follow-up                                             | Intervention                                                                                                                                                                                                                                                                                                                                                               | Participants, n                       | Results                                                                                                                                                                                                                                                                     | Quality Rating |
|----------------------------------------------------------------------------------------------|-----------------------------------------------------------------------------|----------------------------------------------------------------------------------------------------------------------------------------------------------------------------------------------------------------------------------------------------------------------------------------------------------------------------------------------------------------------------|---------------------------------------|-----------------------------------------------------------------------------------------------------------------------------------------------------------------------------------------------------------------------------------------------------------------------------|----------------|
| <b>Studies in adults</b>                                                                     |                                                                             |                                                                                                                                                                                                                                                                                                                                                                            |                                       |                                                                                                                                                                                                                                                                             |                |
| Aveyard et al., 2003 (21)<br>United Kingdom<br>Practice/provider settings                    | RCT<br>9 mo<br>12 mo after baseline                                         | G1: Pro-Change self-help system with workbook and 3 questionnaires to generate tailored feedback<br>G2: G1 plus 3 telephone calls<br>G3: G1 plus 3 nurse visits<br>C1: 2 standard self-help quit guides and 2 tip cards                                                                                                                                                    | 2471 adults                           | No statistically significant difference in quit rates between intervention and control groups (G1, 11%; G2, 12%; G3, 10%; C1, 10%) in biochemically confirmed abstinence for 6-mo sustained abstinence and 12-mo point prevalence                                           | Fair           |
| Bohadana et al., 2000 (22)<br>France, Western Europe<br>Practice/provider settings           | RCT<br>26 wk<br>6 wk and 3, 6, and 12 mo                                    | G1: Nicotine inhaler and nicotine patch<br>C1: Nicotine inhaler and placebo patch                                                                                                                                                                                                                                                                                          | 400 adults                            | Abstinence was greater at 3 mo for intervention group than control group ( $P = 0.02$ )<br>No significant difference between groups at 6- and 12-month follow-up                                                                                                            | Fair           |
| Canga et al., 2000 (24)†<br>Spain, Western Europe;<br>Practice/provider settings<br>Hospital | RCT with systematic randomization<br>6 mo<br>6 mo                           | G1: Interview with nurse; self-help materials; 3 mo of transdermal NRT if eligible; 5 follow-up contacts<br>C1: Usual care for diabetic smokers established in the Navarre diabetes care program                                                                                                                                                                           | 280 young adults, adults              | Intervention group was significantly more likely than control group to quit at 6-mo follow-up (validated): ( $P \leq 0.001$ )                                                                                                                                               | Fair           |
| Carpenter et al., 2004 (25)<br>United States<br>Population-based                             | RCT<br>24 wk<br>3, 6, 12, and 24 wk                                         | G1: Telephone-based reduction counseling and NRT and brief advice to quit<br>G2: Motivational advice (5Rs)† and brief advice<br>C1: No treatment                                                                                                                                                                                                                           | 616 adults                            | At 6 mo, those receiving either intervention had greater percentages of "24-h quit attempts" (G1, 43%; G2, 51%) than those receiving no treatment (C1, 16%) ( $P < 0.01$ )                                                                                                  | Fair           |
| Clark et al., 2004 (26)<br>United States<br>Hospital<br>Practice/provider settings           | RCT<br>Given materials at time of chest CT<br>1 and 12 mo                   | G1: Internet cessation resources handout with Web site addresses<br>C1: Standard self-help material—NCI handout, ACS booklet                                                                                                                                                                                                                                               | 171 adults, age >50 y                 | No statistically significant differences in smoking status found at 1-mo or 1-y follow-up                                                                                                                                                                                   | Fair           |
| Dalsgarth et al., 2004 (27)<br>Denmark<br>Hospital                                           | RCT<br>7 wk<br>26 wk after baseline                                         | G1: 2 motivating telephone calls, 5 clinic visits, and bupropion SR<br>C1: 2 motivating telephone calls, 5 clinic visits, and placebo                                                                                                                                                                                                                                      | 336 adult hospital employees          | Continuous abstinence at 26 wk: G1, 18%; C1, 7% ( $P = 0.008$ )                                                                                                                                                                                                             | Fair           |
| Garvey et al., 2000 (28)<br>United States<br>Population-based                                | RCT<br>2 mo<br>1, 7, 14, and 30 d and 2, 3, 6, 9, and 12 mo after cessation | All participants received self-help booklet and brief behavioral counseling (5–10 min per visit, for 1 y)<br>G1: Low dependence, 2-mg gum<br>G2: Low dependence, 4-mg gum<br>G3: High dependence, 2-mg gum<br>G4: High dependence, 4-mg gum                                                                                                                                | 608 adults                            | Quit rates at 1-y follow-up:<br>Low-dependence smokers: placebo (11.2%); 2 mg (19.5%); 4 mg (18.4%) ( $P = 0.20$ for linear trend)<br>High-dependence smokers: placebo (6.1%); 2 mg (15.7%); 4 mg (20.7%); ( $P = 0.002$ for linear trend)                                  | Fair           |
| Hall et al., 2004 (29)<br>United States<br>Population-based                                  | RCT Brief: 12 wk<br>Extended: 52 wk<br>12, 24, 36, 52 wk                    | G1: Brief nortriptyline: nortriptyline for 12 wk; 5 counseling sessions and NRT patch at week 5<br>C1: Brief placebo: placebo for 12 wk; 5 counseling sessions and NRT at week 5<br>G2: Extended nortriptyline: G1 plus extended pharmacotherapy and counseling (1 session per month) for 52 wk<br>C2: Extended placebo: G2 but with placebo used instead of nortriptyline | 160 adults                            | Nortriptyline was more effective than placebo at 12 wk (OR, 0.69 [95% CI, 0.49–0.92]; $P = 0.02$ ) and 52 wk (OR, 0.47 [CI, 0.30–0.75]; $P = 0.001$ ); however, 52 wk of nortriptyline did not differ significantly from placebo at that same time frame                    | Fair           |
| Hennrikus et al., 2005 (30)†<br>United States<br>Hospital                                    | RCT<br>6 mo<br>7–18 d and 12 mo after discharge                             | G1: 2 smoking cessation manuals, community resources directory, medical record label to care providers, postdischarge letter<br>G2: G1 plus extended bedside counseling session and 3–6 telephone calls for 6 mo after discharge<br>C1: 2 cessation manuals and community resources directory                                                                              | 2095 adults                           | Cotinine-corrected intention-to-treat analysis found percentage of abstinence at 12-mo follow-up ( $P > 0.05$ )<br>Self-reported abstinence rates were significantly higher for G2 ( $P < 0.05$ )                                                                           | Fair           |
| Hitsman et al., 1999 (31)†<br>United States<br>Population-based                              | RCT<br>10 wk<br>1 wk and 1, 3, and 6 mo after quit date                     | G1: Individual CBT; fluoxetine, 30 mg, for 10 wk; fluoxetine adherence level set at <150 ng/mL<br>G2: Same as G1, except 60-g fluoxetine dose and fluoxetine adherence level set at 300 ng/mL<br>C1: Individual CBT plus placebo                                                                                                                                           | 253 adults                            | No significant results found at 1-, 3-, and 6-mo follow-up<br>Individual differences that predict cessation when fluoxetine is combined with CBT include higher levels of weight concern, degree of depression, and levels of nicotine dependence                           | Fair           |
| Holt et al., 2005 (32)†<br>New Zealand;<br>Community-based<br>Population-based               | RCT<br>2 mo<br>3 and 7 wk and 3, 6, 9, and 12 mo after target quit date     | G1: Bupropion and counseling<br>C1: Placebo and counseling                                                                                                                                                                                                                                                                                                                 | 134 adolescents, young adults, adults | Intervention group significantly more likely than control group to be continuously abstinent at 3 mo (risk ratio, 2.54 [CI, 1.30–5.00])                                                                                                                                     | Fair           |
| Jones et al., 2001 (33)†<br>United Kingdom<br>Hospital                                       | RCT<br>6 mo<br>8 wk, 6 mo after ICU discharge                               | G1: Verbal encouragement to patients to remain nonsmokers and for immediate family not to smoke in the same room as the patient, plus self-help manual<br>C1: G1 without the manual                                                                                                                                                                                        | 61 adults                             | Of the smokers pre-ICU admission, fewer intervention patients resumed smoking compared with controls at 6-mo follow-up<br>Antismoking advice in rehabilitation package was associated with risk ratio of 0.11 (CI, 0.02–0.64) and reduction in smoking of 89% (CI, 98%–36%) | Fair           |
| Jorenby et al., 1999 (34)<br>United States<br>Community-based                                | RCT<br>9 wk<br>10 wk and 3, 6, and 12 mo after start of study               | G1: bupropion and nicotine patch<br>G2: bupropion and placebo patch<br>G3: placebo tablets and nicotine patch<br>C1: placebo tablets and placebo patch                                                                                                                                                                                                                     | 893 adults                            | Those receiving bupropion and patch were most likely ( $P \leq 0.001$ ) to be abstinent at 6 and 12 mo                                                                                                                                                                      | Fair           |

Appendix Table 4—Continued

| Study, Year, Setting (Reference)                                                                         | Design, Exposure, and Follow-up                                          | Intervention                                                                                                                                                                                                                                                                                                                                                                                                                                                                                                             | Participants, n                                          | Results                                                                                                                                                                                                                                                                                                                                                                                                              | Quality Rating |
|----------------------------------------------------------------------------------------------------------|--------------------------------------------------------------------------|--------------------------------------------------------------------------------------------------------------------------------------------------------------------------------------------------------------------------------------------------------------------------------------------------------------------------------------------------------------------------------------------------------------------------------------------------------------------------------------------------------------------------|----------------------------------------------------------|----------------------------------------------------------------------------------------------------------------------------------------------------------------------------------------------------------------------------------------------------------------------------------------------------------------------------------------------------------------------------------------------------------------------|----------------|
| Killen et al., 2000 (16)<br>United States<br>Population-based                                            | RCT<br>17 wk<br>4, 10, and 26 wk                                         | G1: NRT transdermal system patch for 8 wk plus 20-mg paroxetine for 9 wk<br>G2: NRT transdermal system patch for 8 wk plus 40-mg paroxetine for 9 wk<br>C1: NRT transdermal system patch for 8 wk plus placebo for 9 wk                                                                                                                                                                                                                                                                                                  | 224 adults                                               | No significant differences in abstinence found between groups at any follow-up time period                                                                                                                                                                                                                                                                                                                           | Good           |
| Lancaster et al., 1999 (36)<br>United Kingdom<br>Practice/provider settings                              | RCT with systematic randomization<br>6 wk<br>3 and 12 mo after quit date | G1: Brief advice to quit from general practitioner, plus extended counseling with a nurse; leaflet on cessation; fact sheet on NRT; invitation to contact the research nurse for more intensive, tailored counseling; NRT if necessary<br>C1: Brief advice to quit from the patients' general practitioners                                                                                                                                                                                                              | 497 adults                                               | No significant differences found between groups at 3- and 12-mo follow-up                                                                                                                                                                                                                                                                                                                                            | Fair           |
| Lerman et al., 2004 (37)<br>United States<br>Population-based                                            | RCT<br>8 wk<br>8 wk and 6 mo                                             | G1: 8 wk of nicotine nasal spray and 7 sessions of behavioral group counseling<br>G2: 8 wk of transdermal nicotine therapy (i.e., patch) and 7 sessions of behavioral group counseling                                                                                                                                                                                                                                                                                                                                   | 299 adults                                               | No statistically significant difference found between treatment groups at 6 mo (G1, 12.2%; G2, 15%; $P > 0.20$ )<br>Smokers who were highly dependent, obese, or members of minority groups achieved higher rates of abstinence with nasal spray                                                                                                                                                                     | Fair           |
| MacLeod et al., 2003 (17)<br>Australia<br>Population-based                                               | RCT<br>10 wk<br>1, 2, 3, and 6 mo                                        | G1: Nicotine patch and 5 telephone counseling calls<br>C1: Nicotine patch only                                                                                                                                                                                                                                                                                                                                                                                                                                           | 854 adults                                               | Telephone counseling improves cessation rates when used with the patch<br>28-d continuous abstinence rates at 6 mo: G1, 30.6%; C1, 22.4% ( $P = 0.01$ )<br>90-d continuous abstinence rates: G1, 26.7%; C1, 18.6% ( $P = 0.004$ )                                                                                                                                                                                    | Good           |
| Peterson, 2004 (39) <sup>†</sup><br>United States<br>Hospital                                            | RCT<br>3 mo<br>12 mo                                                     | G1: Brief physician counseling and usual care plus nurse managed, cognitive-behavioral relapse prevention intervention given before discharge, <5 structured telephone contacts after discharge, and counseling for relapse management as needed<br>C1: Brief physician counseling, self-help pamphlet, and list of community resources                                                                                                                                                                                  | 277 adult women                                          | No significant differences between groups at 12-mo follow-up                                                                                                                                                                                                                                                                                                                                                         | Fair           |
| Simon et al., 2004 (41)<br>United States<br>Hospital                                                     | RCT<br>7 wk<br>7 wk and 3, 6, and 12 mo                                  | G1: 7-wk course of bupropion, 2-mo transdermal NRT, 1 visit with counselor (30- to 60-min session), and 5 telephone follow-up calls<br>C1: Same as G1 except participants received placebo instead of bupropion                                                                                                                                                                                                                                                                                                          | 244 adults (86% male)                                    | No statistically significant differences in smoking cessation rates at end of medication or at 3, 6, and 12 mo<br>Addition of 7-wk treatment with bupropion did not significantly increase quit rates over NRT and counseling                                                                                                                                                                                        | Fair           |
| Swan et al., 2003 and 2003 (42, 43)<br>United States<br>Practice/provider settings                       | RCT<br>12 mo<br>3 and 12 mo                                              | All participants received bupropion SR for 7 wk<br>G1: 150 mg of bupropion SR, brief counseling telephone call the day after quit date, personalized intervention materials, and access to 24-h automated support line<br>G2: G1 except 300 mg of bupropion SR<br>G3: 150 mg of bupropion SR, self-help materials, support materials for family and friends, in-depth telephone counseling session, 4 brief telephone counseling calls, and access to toll-free "quitline" for 1 y<br>G4: G3 with 300 mg of bupropion SR | 1524 adults                                              | 7-d point prevalence of nonsmoking at 3 mo for 300 mg vs. 150 mg: OR, 1.18 (CI, 1.05–1.32; $P = 0.005$ )<br>At 12 mo, moderate vs. minimal counseling: OR, 1.21 (CI, 1.08–1.35; $P = 0.001$ )<br>OR for 12-mo smoking was 23% higher for those who received tailored mailings vs. those who received proactive telephone counseling: OR, 1.24 (CI, 1.03–1.47)<br>300-mg dose was associated with more adverse events | Fair           |
| <b>Studies in special populations</b>                                                                    |                                                                          |                                                                                                                                                                                                                                                                                                                                                                                                                                                                                                                          |                                                          |                                                                                                                                                                                                                                                                                                                                                                                                                      |                |
| Brown et al., 2001 (23)<br>United States<br>Population-based                                             | RCT<br>6 wk<br>1, 6, and 12 mo                                           | G1: Group CBT for smoking cessation plus additional CBT on coping for depression<br>C1: Group CBT for smoking cessation alone                                                                                                                                                                                                                                                                                                                                                                                            | 179 formerly depressed adults                            | In main analysis, smoking abstinence did not differ when CBT tailored for depression was added; in secondary analysis, CBT tailored for depression had significant interactions with heavy smoking and recurrent depression: OR, 2.30 (CI, 1.05–5.03)                                                                                                                                                                | Fair           |
| Joseph et al., 2004 (20)<br>United States<br>Residential program for treatment of substance use disorder | RCT<br>10 wk<br>3, 6, 9, 12, and 18 mo                                   | G1: Individual behavioral therapy; recommended nicotine patches (21 mg for 6 wk, 14 mg for 2 wk, and 7 mg for 2 wk) for smokers; combination of patches and nicotine gum for persons who smoked >20 cigarettes per day<br>C: Temporary control group with treatment delayed for 6 mo                                                                                                                                                                                                                                     | 499 adults with substance use disorders                  | At 3 and 6 mo, smoking abstinence rates were significantly greater in treatment groups than in temporary control group ( $P < 0.000$ and $P = 0.02$ , respectively)                                                                                                                                                                                                                                                  | Good           |
| Joseph, 1993 (35)<br>United States<br>Hospital                                                           | Prospective cohort study<br>3 wk<br>1 y after hospitalization            | G1: No specific information on smoking or cessation; smoking allowed in designated rooms and not during group sessions<br>G2: Upon admission, patient signed contract to abstain from nicotine during stay; cessation program provided; clonidine patches available                                                                                                                                                                                                                                                      | 706 adults enrolled in substance abuse treatment program | Patients who wanted to quit smoking at 3-wk follow-up: prepolicy, 24%; postpolicy, 61% ( $P < 0.001$ )<br>Patients who quit smoking at 1-y follow-up: prepolicy, 3%; postpolicy, 8% ( $P < 0.05$ )                                                                                                                                                                                                                   | Fair           |

Continued on following page

## Appendix Table 4—Continued

| Study, Year, Setting (Reference)                                             | Design, Exposure, and Follow-up                                                                         | Intervention                                                                                                                                                                                                                                                                                  | Participants, <i>n</i>                                 | Results                                                                                                                                                                                                               | Quality Rating |
|------------------------------------------------------------------------------|---------------------------------------------------------------------------------------------------------|-----------------------------------------------------------------------------------------------------------------------------------------------------------------------------------------------------------------------------------------------------------------------------------------------|--------------------------------------------------------|-----------------------------------------------------------------------------------------------------------------------------------------------------------------------------------------------------------------------|----------------|
| McBride et al., 2004 (38)<br>United States<br>Military medical center        | RCT<br>First trimester to delivery and 12 mo postpartum<br>28 wk pregnant<br>Postpartum 2, 6, and 12 mo | G1: Usual care plus late pregnancy relapse kit and 6 counseling calls<br>G2: G1, plus the partners received telephone counseling and support guide (partners who smoked received cessation aids and counseling)<br>C1: Usual care by provider                                                 | 583 pregnant women and their partners                  | No statistically significant difference between groups at any follow-up point<br>In late pregnancy, more partners abstinent in G2 (15%) than C1 (5%); <i>P</i> = 0.02                                                 | Fair           |
| Quist-Paulsen and Gallefoss, 2003 (18)<br>Norway<br>Hospital: cardiac ward   | RCT<br>5 mo<br>12 mo                                                                                    | G1: Self-help booklet on how to quit smoking plus cardiac nurse consultation during in-patient days and telephone consultation for up to 5 mo after discharge<br>C1: Group sessions with nurses, with minor emphasis on smoking cessation and no further advice or instruction on how to quit | 240 adults                                             | At 1 y, quit rate was greater (57%) in intensive nurse intervention group than in minimal intervention group (37%) (absolute risk reduction, 20 percentage points [CI, 6.4–33.0 percentage points]; <i>P</i> = 0.004) | Good           |
| Ratner et al., 2004 (40)<br>Western Canada<br>Teaching hospital              | Randomly assigned pretest–posttest control group experiment<br>Not reported<br>6 and 12 mo              | G1: 2 face to face counseling sessions and 9 telephone counseling sessions<br>C1: Standard hospital treatment                                                                                                                                                                                 | 237 surgical patients                                  | G1 more likely to be abstinent than C1 (74% vs. 53%; <i>P</i> = 0.003) at 6 mo, but difference was not significant at 12 mo after surgery                                                                             | Fair           |
| Reid et al., 2003 (19)<br>Canada<br>Hospital: tertiary care cardiac facility | RCT<br>8 wk<br>3 mo and 1 y                                                                             | G1: Self-help booklet given in the hospital, then follow-up by nurse counselor at 4 wk after discharge; if patient was smoking, nurse provided three 20-min face-to-face sessions over 8 wk and offered nicotine patch therapy                                                                | 254 hospitalized patients with coronary artery disease | Smoking cessation rates increased from 42% at hospitalization to 53% at 3-mo follow-up ( <i>P</i> = 0.05), but difference was not significant at 1-y follow-up                                                        | Good           |

\* ACS = American Cancer Society; C = control group; CBT = cognitive behavioral therapy; CT = computed tomography; G = intervention group; ICU = intensive care unit; NCI = National Cancer Institute; NRT = nicotine replacement therapy; OR = odds ratio; RCT = randomized, controlled trial; SR = sustained release.

† General and special populations.

‡ Relevance, Risks, Rewards, Roadblocks, Repetition.
